# Supplementary material for: Lead iodide perovskite light-emitting field-effect transistor
Source: PubMed Central journal article supplement (PMC4491174; doi:10.1038/ncomms8383), 2015-06-25
Supplement: ncomms8383-s1.pdf [file ncomms8383-s1.pdf]

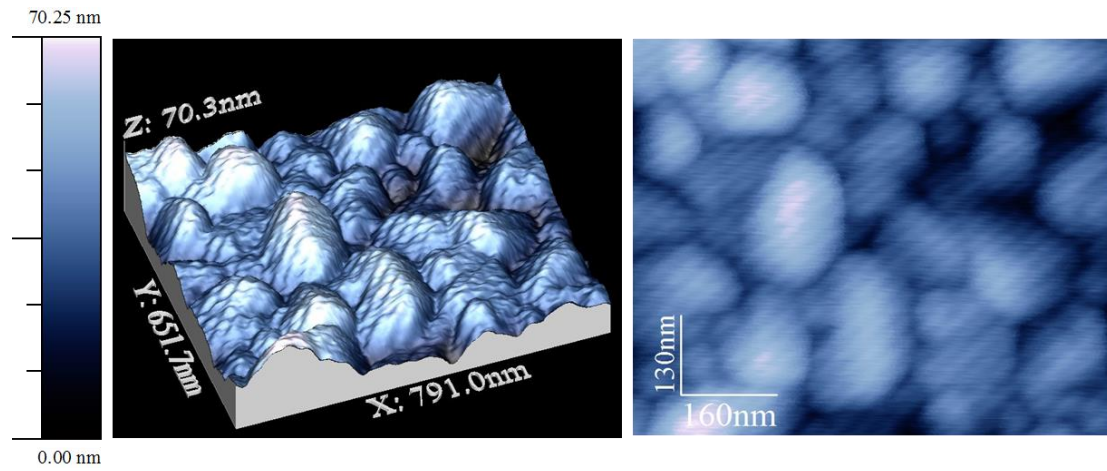

**Supplementary Figure 1 | Atomic force microscopy (AFM) characterization of the  $\text{CH}_3\text{NH}_3\text{PbI}_3$  film.**

Surface images of the film obtained by spin coating on  $\text{Si}(p++)/\text{SiO}_2$  substrates. The measured root mean squared roughness is  $R_{\text{RMS}} = 10.8 \text{ nm}$ .

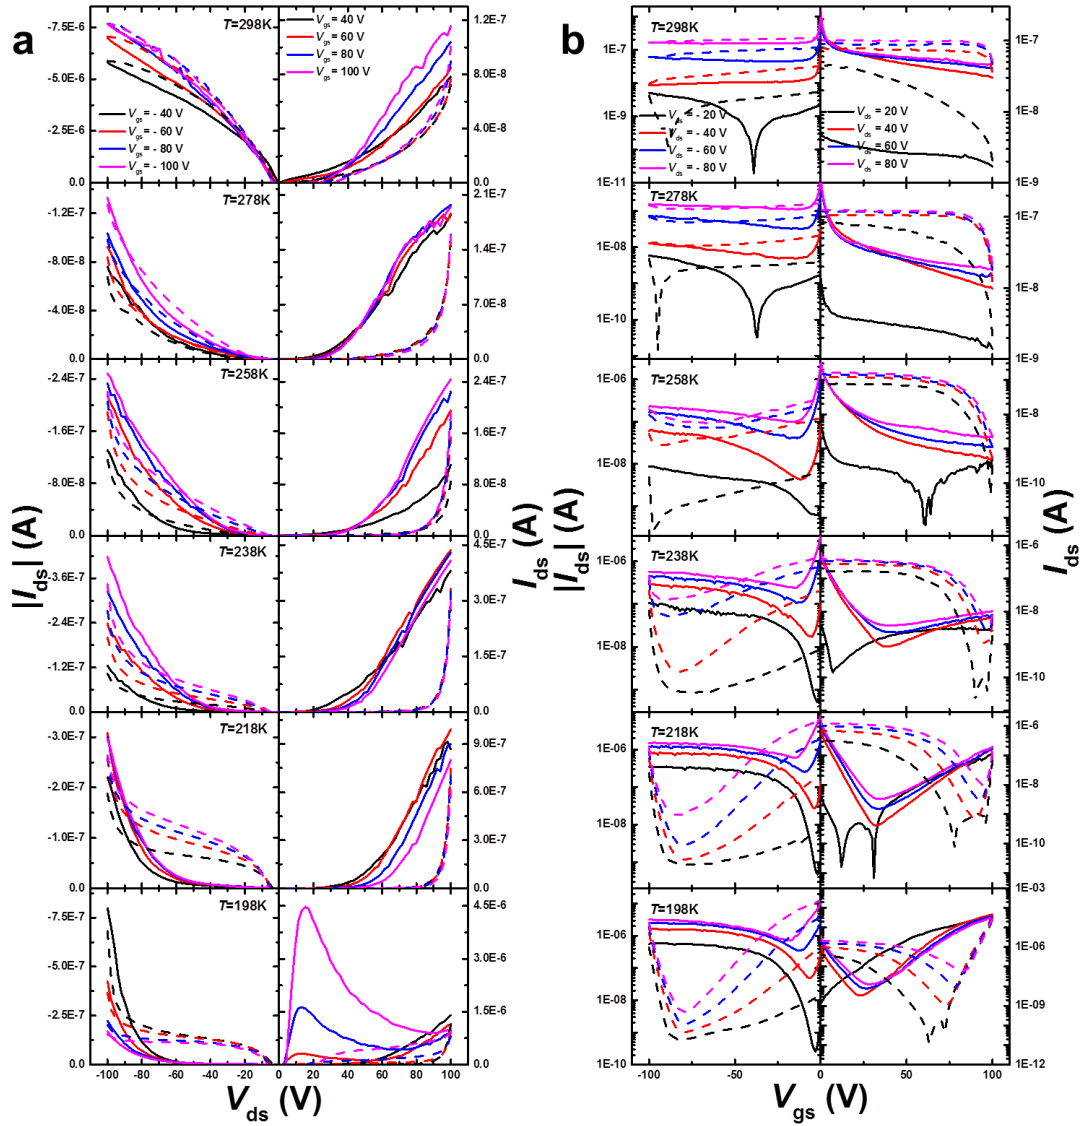

**Supplementary Figure 2 | FET characteristics at 298 K, 278 K, 258 K, 238 K, 218 K, and 198 K. a,** FET output characteristics. The n-type output characteristics have been measured at  $V_{gs} = 40$  V to 100 V ( $V_{gs} = 40$  V black,  $V_{gs} = 60$  V red,  $V_{gs} = 80$  V blue,  $V_{gs} = 100$  V magenta), while the p-type output characteristics (left column) are measured at  $V_{gs} = -40$  V to -100 V ( $V_{gs} = -40$  V black,  $V_{gs} = -60$  V red,  $V_{gs} = -80$  V blue,  $V_{gs} = -100$  V magenta). **b,** FET transfer characteristics (ambipolar). The n-type transfer characteristics are measured at  $V_{ds} = 20$  V to 80 V ( $V_{ds} = 20$  V black,  $V_{ds} = 40$  V red,  $V_{ds} = 60$  V blue,  $V_{ds} = 80$  V magenta), while the p-type transfer characteristics (left column) are measured at  $V_{ds} = -20$  V to -80 V ( $V_{ds} = -20$  V black,  $V_{ds} = -40$  V red,  $V_{ds} = -60$  V blue,  $V_{ds} = -80$  V magenta). Solid and dashed curves are measured with forward and backward sweeping, respectively.

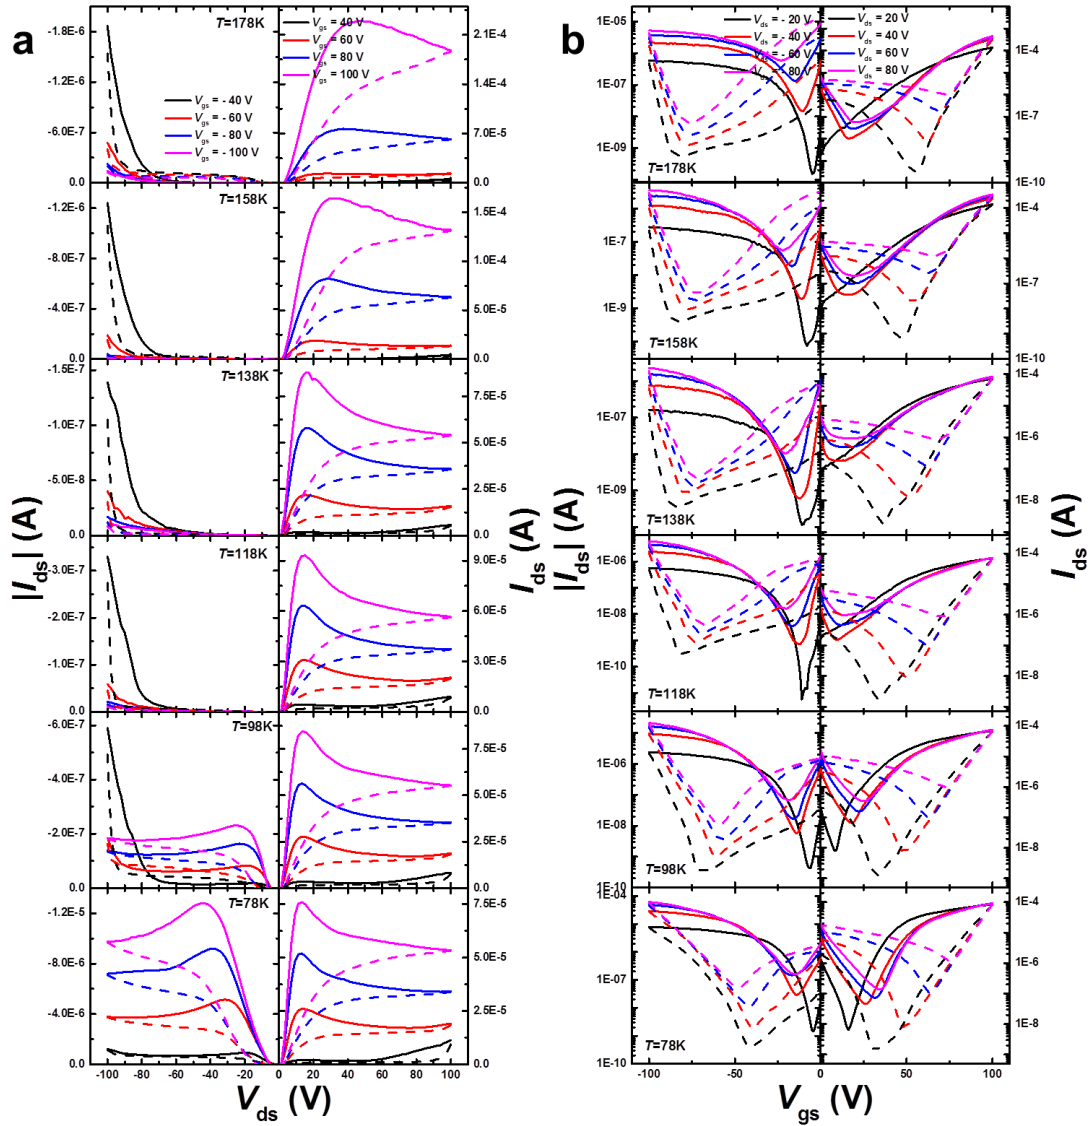

**Supplementary Figure 3 | FET characteristics at 178 K, 158 K, 138 K, 118 K, 98 K, and 78 K. a,** FET output characteristics. The n-type output characteristics have been measured at  $V_{gs} = 40$  V to 100 V ( $V_{gs} = 40$  V black,  $V_{gs} = 60$  V red,  $V_{gs} = 80$  V blue,  $V_{gs} = 100$  V magenta), while the p-type output characteristics (left column) are measured at  $V_{gs} = -40$  V to  $-100$  V ( $V_{gs} = -40$  V black,  $V_{gs} = -60$  V red,  $V_{gs} = -80$  V blue,  $V_{gs} = -100$  V magenta). **b,** FET transfer characteristics (ambipolar). The n-type transfer characteristics are measured at  $V_{ds} = 20$  V to 80 V ( $V_{ds} = 20$  V black,  $V_{ds} = 40$  V red,  $V_{ds} = 60$  V blue,  $V_{ds} = 80$  V magenta), while the p-type transfer characteristics (left column) are measured at  $V_{ds} = -20$  V to  $-80$  V ( $V_{ds} = -20$  V black,  $V_{ds} = -40$  V red,  $V_{ds} = -60$  V blue,  $V_{ds} = -80$  V magenta). Solid and dashed curves are measured with forward and backward sweeping, respectively.

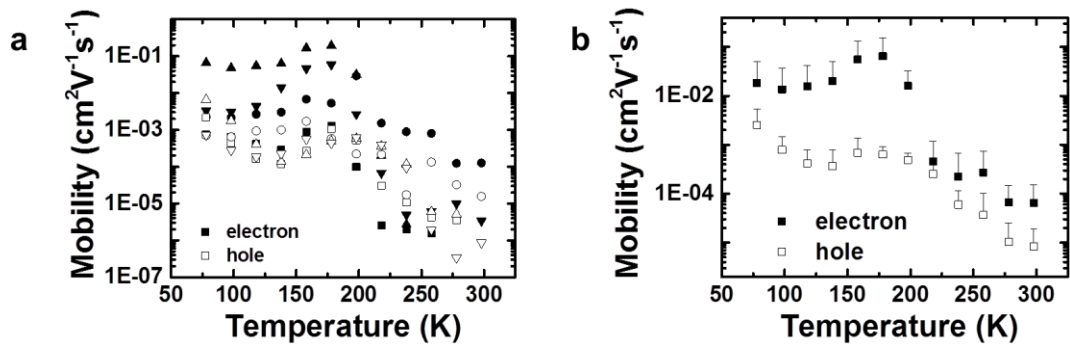

**Supplementary Figure 4 | Field effect mobilities across 4 different devices.** **a**, Field-effect mobilities from 4 different devices, represented by square, circle, up triangle, down triangle. The filled symbols are electron mobilities, while the empty symbols are hole mobilities. **b**, Average mobilities and error bars obtained by averaging across 4 devices.

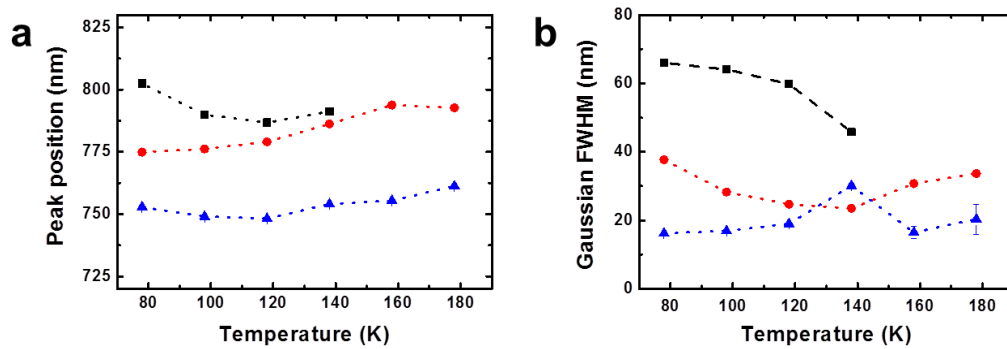

**Supplementary Figure 5 | Electroluminescence fitting parameters.** Peak position (a) and FWHM (b) of Peak 1 (blue triangles), Peak 2 (red circles), and Peak 3 (black square) as a function of temperature. The values are obtained by fitting a deconvoluted double/triple peak Gaussian function on **Figure 4**.

**Supplementary Table 1 | Calculated effective masses of charge carriers.** Estimated effective mass for electron and hole of  $\text{CH}_3\text{NH}_3\text{PbI}_3$  from band structure including spin-orbital coupling effect.

| Phase        |             | $m_e^*$ | $m_h^*$ | Reduced Masses |
|--------------|-------------|---------|---------|----------------|
| Tetragonal   | $\Gamma$ -X | 0.178   | 0.261   | 0.106          |
|              | $\Gamma$ -Z | 0.284   | 0.474   | 0.177          |
|              | $\Gamma$ -M | 0.129   | 0.284   | 0.089          |
|              | Average     | 0.197   | 0.340   | 0.124          |
| Orthorhombic | $\Gamma$ -X | 0.289   | 0.344   | 0.157          |
|              | $\Gamma$ -Z | 0.189   | 0.370   | 0.125          |
|              | Average     | 0.239   | 0.357   | 0.143          |

**Supplementary Table 2 | Required parameters for calculating mobilities.** Band ( $m_b^*$ ), conductivity ( $m_l^*$ ) and density of state ( $m^*$ ) effective mass, electron (hole)-phonon coupling ( $\Xi$ ), and bulk modulus ( $B$ ).

|            | Tetragonal |       | Orthorhombic |       |
|------------|------------|-------|--------------|-------|
|            | Electron   | Hole  | Electron     | Hole  |
| $m_b^*$    | 0.197      | 0.340 | 0.239        | 0.357 |
| $m_l^*$    | 0.157      | 0.290 | 0.163        | 0.288 |
| $m^*$      | 0.166      | 0.304 | 0.173        | 0.291 |
| $\Xi$ (eV) | 7.2        | 8.4   | 6.8          | 7.4   |
| $B$ (GPa)  | 2.6        | 2.6   | 3.3          | 3.3   |
